# Supplementary figures and images for: Sex differences in mortality in stable patients undergoing vasodilator stress cardiovascular magnetic resonance
Source: HighWire-hosted journal article supplement (doi:10.1136/openhrt-2021-001619), 2021-05-01

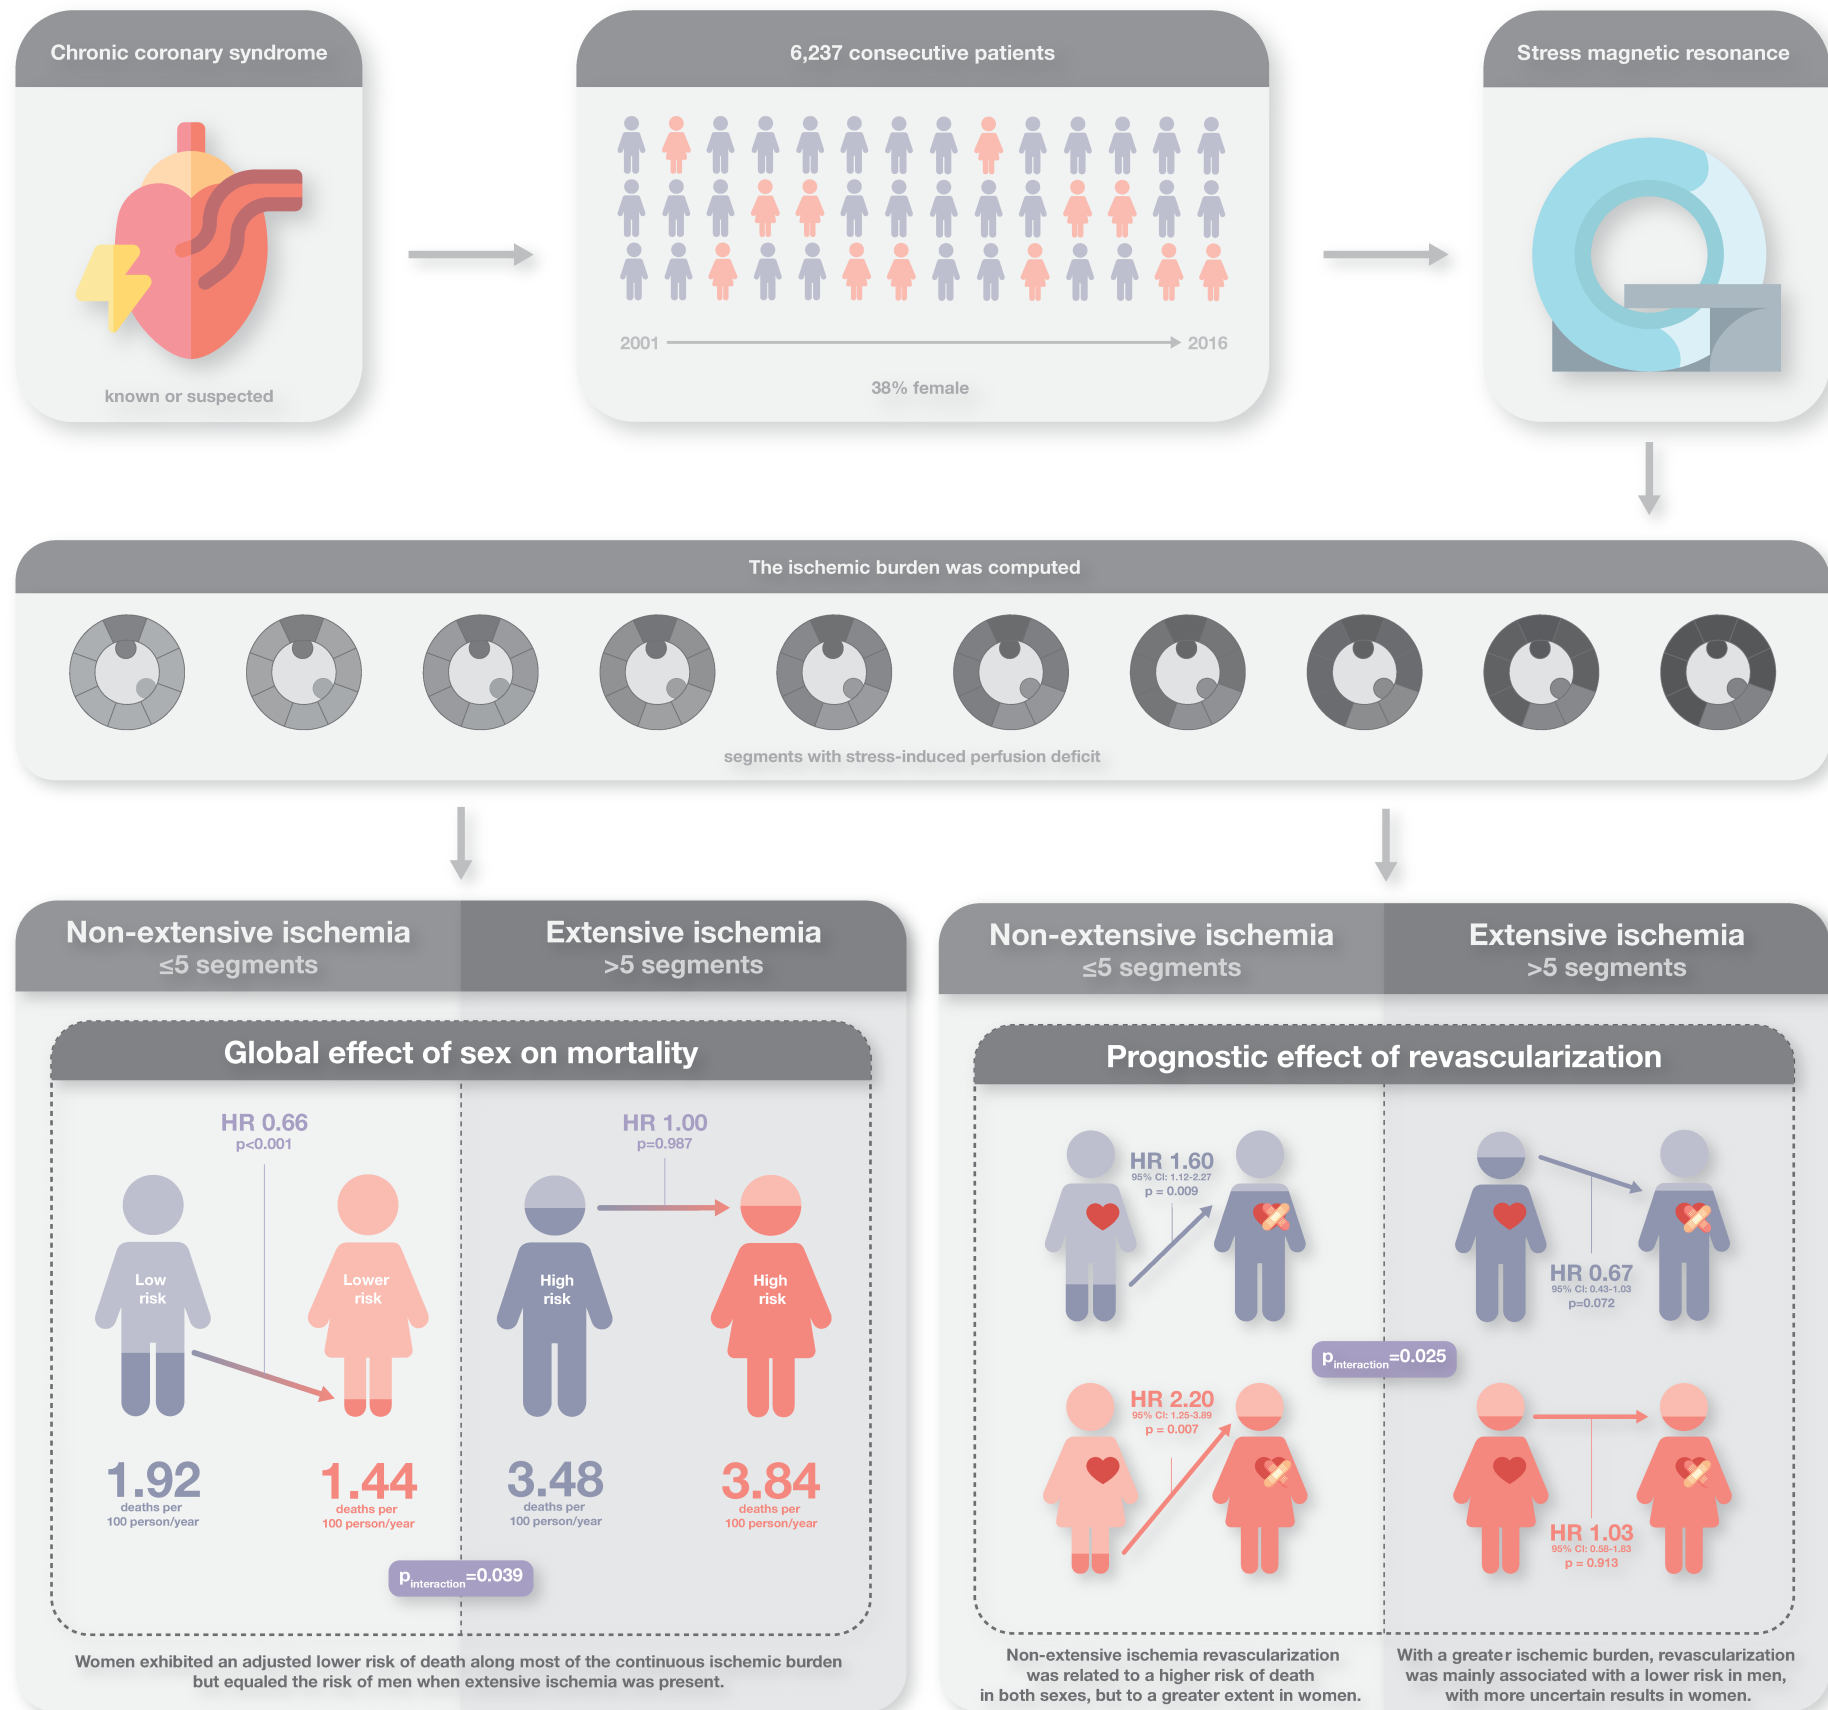

Central illustration contains some elements made by Freepik from www.freepik.com

Supplement: openhrt-2021-001619supp006_data_supplement.pdf [file openhrt-2021-001619supp006_data_supplement.pdf]
